# Supplementary material
Source: PubMed Central journal article supplement (PMC2275034)
Supplement: blood_blood-2007-03-080309_1.pdf [file blood_blood-2007-03-080309_1.pdf]

|                    | IBL-1                                                                                                                                                                                               | BCKN-1                                                                                                                                              |
|--------------------|-----------------------------------------------------------------------------------------------------------------------------------------------------------------------------------------------------|-----------------------------------------------------------------------------------------------------------------------------------------------------|
| Clinical history   | 40-year-old homosexual white man diagnosed with AIDS on the basis of HIV seropositivity and cutaneous Kaposi's sarcoma. Enlarged right submandibular gland was interpreted as a malignant lymphoma. | 78 year old man with history of pulmonary TB >50 years before diagnosis. Status post pneumothorax for therapy. Large pleural lymphomatous effusion. |
| Viral associations | EBV (Southern blot and EBER ISH) +<br>KSHV (Southern blot, PCR and LANA IHC) –                                                                                                                      | EBV (EBER ISH): +<br>KSHV (PCR and LANA IHC): –                                                                                                     |
| Karyotype          | 46,XY,add(1)(q42),add(7)(p22)[cp 9]                                                                                                                                                                 | 46,X,-Y,del(6)(p21.1),i(7)(q10),dup(13)(q21q21),+14,add(15)(p11.2),+16,der(18)t(1;18)(q21;p11.3),+21,-22,+mar1x2[10]                                |
| Genotype           | Ig heavy chain: monoclonal rearrangements by Southern blot                                                                                                                                          | Ig heavy chain: monoclonal rearrangements by PCR                                                                                                    |
| Phenotype          | CD20: +<br>CD30: +<br>PAX5: +<br>CD3: –<br>Kappa light chain: few cells faint +<br>Lambda light chain: –                                                                                            | CD20: rare cells +<br>CD30: +<br>Pax5: +<br>CD3: rare cells +<br>Kappa light chain: –<br>Lambda light chain: –                                      |

Abbreviations: ISH, in situ hybridization, IHC, immunohistochemistry, Ig: immunoglobulin
